# Supplementary material
Source: publisher site journal article supplement (https://www.dovepress.com/article/328307)
Supplement: Supplementary file 1 [file get_supplementary_file.php]

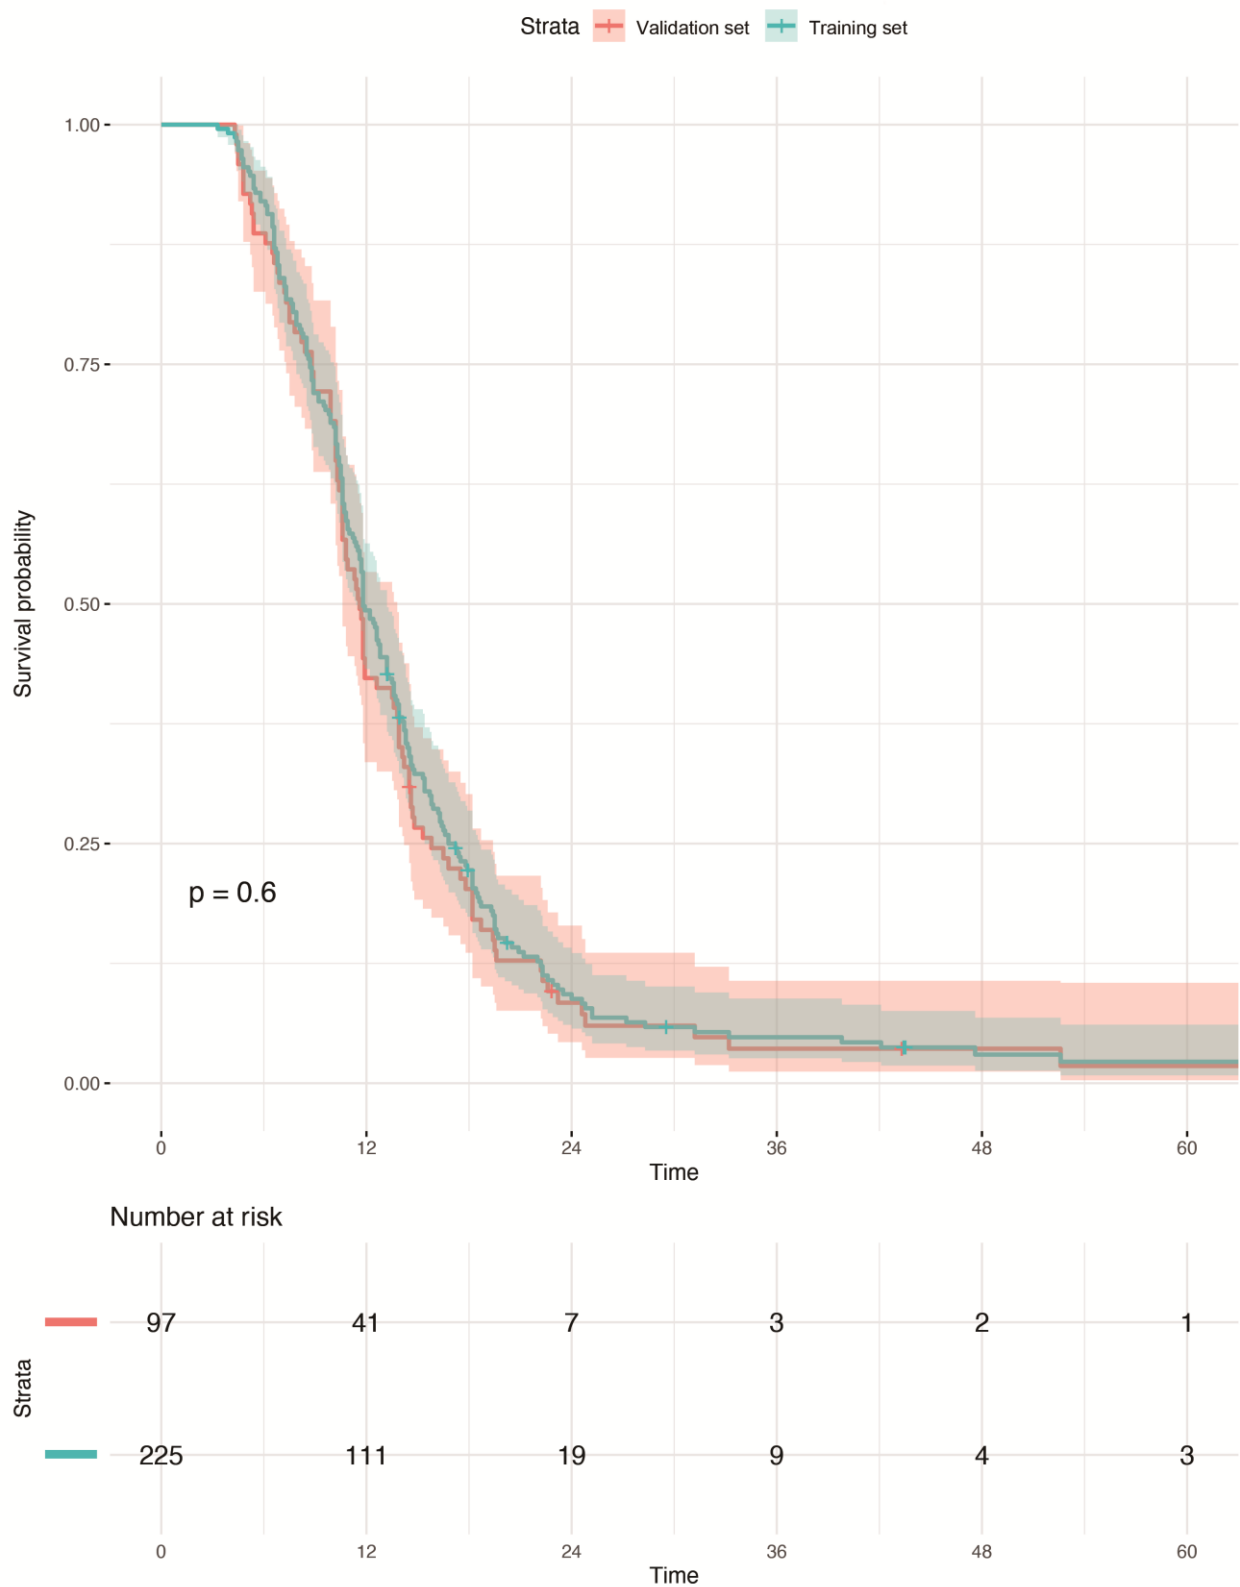

**Supplementary Figure. S1.** Kaplan–Meier analysis of overall survival in the training set and validation set.

The number at risk refers to the number of patients who have not relapsed at the corresponding time point.
